1 **Title:** Characterization of extracellular vesicles and artificial nanoparticles with four orthogonal  
2 single-particle analysis platforms

3

4 **Authors:**

5 Emily R. Mallick<sup>1,#</sup>, [emilymallick@gmail.com](mailto:emilymallick@gmail.com)

6 Tanina Arab<sup>1,#</sup> ORCID 0000-0003-4485-1096, [tarab1@jhu.edu](mailto:tarab1@jhu.edu)

7 Yiyao Huang<sup>1</sup> ORCID 0000-0003-1749-963X, [yiyao.huang@jhu.edu](mailto:yiyao.huang@jhu.edu)

8 Liang Dong<sup>2</sup> ORCID 0000-0001-7689-3237, [ldong4@jhmi.edu](mailto:ldong4@jhmi.edu)

9 Zhaohao Liao<sup>1</sup>, [zlhao@jhmi.edu](mailto:zlhao@jhmi.edu)

10 Zezhou Zhao<sup>1</sup> ORCID 0000-0003-4792-6073, [zach.zhao621@gmail.com](mailto:zach.zhao621@gmail.com)

11 Barbara Smith<sup>3</sup>, [bsmit112@jhmi.edu](mailto:bsmit112@jhmi.edu)

12 Norman J. Haughey<sup>4</sup> ORCID 0000-0001-5194-4122, [nhaughe1@jhmi.edu](mailto:nhaughe1@jhmi.edu)

13 Kenneth J. Pienta<sup>2</sup> ORCID 0000-0002-4138-2186, [kpienta1@jhmi.edu](mailto:kpienta1@jhmi.edu)

14 Barbara S. Slusher<sup>4,5</sup> ORCID 0000-0001-9814-4157, [bslusher@jhmi.edu](mailto:bslusher@jhmi.edu)

15 Patrick M. Tarwater<sup>6</sup> ORCID 0000-0002-6791-1090, [tarwater@jhu.edu](mailto:tarwater@jhu.edu)

16 Juan Pablo Tosar<sup>7,8</sup> ORCID 0000-0002-2021-2479, [jptosar@pasteur.edu.uy](mailto:jptosar@pasteur.edu.uy)

17 Angela M. Zivkovic<sup>9</sup> ORCID 0000-0002-2828-7862, [amzivkovic@ucdavis.edu](mailto:amzivkovic@ucdavis.edu)

18 Wyatt N. Vreeland<sup>10</sup> ORCID 0000-0003-0524-8403, [wyatt.vreeland@nist.gov](mailto:wyatt.vreeland@nist.gov)

19 Michael E. Paulaitis<sup>11</sup> ORCID 0000-0002-9628-1091, [michaelp@jhmi.edu](mailto:michaelp@jhmi.edu)

20 Kenneth W. Witwer<sup>1,4,\*</sup> ORCID 0000-0003-1664-4233, [kwitwer1@jhmi.edu](mailto:kwitwer1@jhmi.edu)

21

22 **Author Information:**

23 <sup>1</sup>Department of Molecular and Comparative Pathobiology, Johns Hopkins University School of  
24 Medicine, Baltimore, MD, US

25 <sup>2</sup>Department of Urology, Johns Hopkins University School of Medicine, Baltimore, MD, US

26 <sup>3</sup>Department of Cell Biology, Johns Hopkins University School of Medicine, Baltimore, MD,  
27 US

28 <sup>4</sup>Department of Neurology, Johns Hopkins University School of Medicine, Baltimore, MD, US

29 <sup>5</sup>Johns Hopkins Drug Discovery, Johns Hopkins University School of Medicine, Baltimore,  
30 MD

31 <sup>6</sup>Department of Epidemiology, Johns Hopkins University Bloomberg School of Public Health,  
32 Baltimore, MD, US

33 <sup>7</sup>Faculty of Science, Universidad de la República, Montevideo, Uruguay

34 <sup>8</sup>Functional Genomics Unit, Institut Pasteur de Montevideo, Montevideo, Uruguay

35 <sup>9</sup>Department of Nutrition, University of California Davis, Davis, CA, US

36 <sup>10</sup>Bioprocess Measurement Group, National Institute of Standards and Technology,  
37 Gaithersburg, MD, US

38 <sup>11</sup>Center for Nanomedicine at the Wilmer Eye Institute, Johns Hopkins University School of  
39 Medicine, Baltimore, MD, US

40

41 #These authors contributed equally to this work

42

43 **\*Corresponding Author:**

44 Kenneth W. Witwer, PhD

45 733 North Broadway

46 Miller Research Building, Room 827

47 Baltimore, MD 21205

48 Phone: 1-410-955-9770

49 Fax: 1-410-955-9823

50 Email: [kwitwer1@jhmi.edu](mailto:kwitwer1@jhmi.edu)

51

52 **Keywords:** extracellular vesicles, exosomes, microvesicles, ectosomes, nanoparticle tracking

53 analysis, single particle interferometric reflectance imaging sensing, resistive pulse sensing,

54 nanoflow cytometry

55

56

57 **ABSTRACT**

58 We compared four orthogonal technologies for sizing, counting, and phenotyping of extracellular  
59 vesicles (EVs) and synthetic particles. The platforms were: single-particle interferometric  
60 reflectance imaging sensing (SP-IRIS) with fluorescence, nanoparticle tracking analysis (NTA)  
61 with fluorescence, microfluidic resistive pulse sensing (MRPS), and nanoflow cytometry  
62 measurement (NFCM). Results were compared with standard EV characterization techniques  
63 such as transmission electron microscopy (TEM) and Western blot (WB). EVs from the human T  
64 lymphocyte line H9 (high CD81, low CD63) and the promonocytic line U937 (low CD81, high  
65 CD63) were separated from culture conditioned medium (CCM) by differential  
66 ultracentrifugation (dUC) or a combination of ultrafiltration (UF) and size exclusion  
67 chromatography (SEC) and characterized per MISEV2018 guidelines. Mixtures of synthetic  
68 particles (silica and polystyrene spheres) with known sizes and/or concentrations were also  
69 tested. MRPS and NFCM returned similar particle counts, while NTA detected counts  
70 approximately one order of magnitude lower for EVs, but not for synthetic particles. SP-IRIS  
71 events could not be used to estimate particle concentrations. For sizing, SP-IRIS, MRPS, and  
72 NFCM returned similar size profiles, with smaller sizes predominating (per power law  
73 distribution), but with sensitivity typically dropping off below diameters of 60 nm. NTA detected  
74 a population of particles with a mode diameter greater than 100 nm. Additionally, SP-IRIS,  
75 MRPS, and NFCM were able to identify at least three of four distinct size populations in a  
76 mixture of silica or polystyrene nanoparticles. Finally, for tetraspanin phenotyping, the SP-IRIS  
77 platform in fluorescence mode and NFCM were able to detect at least two markers on the same  
78 particle. Based on the results of this study, we can draw conclusions about existing single-

79 particle analysis capabilities that may be useful for EV biomarker development and mechanistic

80 studies.

81

82

## 83 INTRODUCTION

84

85 Classification of extracellular vesicles (EVs) into subtypes has been proposed based on size,  
86 biogenesis pathway, separation procedure, cellular or tissue origin, and function, among others  
87 [1–6]. However, reproducible classification of EV subtypes will require single-particle  
88 characterization techniques including phenotyping by surface molecules or molecular signatures  
89 [7,8]. In this sense, current knowledge of EV subtypes could be compared with knowledge of  
90 immune cells in the 1970s and early 1980s. Around that time, multiplexed flow cytometry  
91 capabilities and cell sorting were developed, allowing more precise identification,  
92 characterization, and molecular and functional profiling of immune cell subsets [9]. Single-  
93 particle technologies for much smaller biological entities will be needed to divide heterogeneous  
94 EV populations into well-defined and easily recognized subgroups.

95

96 In this study, we evaluated several particle types and single-particle characterization platforms.  
97 For input, we used a selection of biological and synthetic particles. EVs were separated from  
98 culture medium of H9 T lymphocytic cells and U937 promonocytic cells using several methods.  
99 These two cell lines were chosen because they display distinct tetraspanin levels. Specifically,  
100 H9 have high CD81 and low CD63 levels, while U937 produce little CD81 but abundant CD63.  
101 Mixtures of distinct sizes of synthetic silica and polystyrene beads were also tested. The  
102 technology platforms (Text Box 1) were: single-particle interferometric reflectance imaging  
103 sensing (SP-IRIS, NanoView) [10,11] with fluorescence, nanoparticle tracking analysis (NTA,  
104 ParticleMetrix) [12–14] with fluorescence, microfluidic resistive pulse sensing (MRPS,  
105 Spectradyne) [14,15], and nanoflow cytometry measurement (NFCM, NanoFCM) [16,17].

106

### **Text Box 1: Evaluated Technologies**

Single-particle interferometric reflectance imaging sensing (SP-IRIS) captures particles (*e.g.* EVs) onto a chip by affinity reagents, usually antibodies, to surface antigens. Particles are imaged by interferometric reflectance for sizing and counting, and fluorescence detection may be done for up to three channels for surface antigens or internal molecules following fixation and permeabilization. Website for the platform we used: <https://www.nanoviewbio.com/>

Nanoparticle tracking analysis (NTA) is an optical method to track single particles and assign sizes and counts. Measuring Brownian motion allows calculation of a hydrodynamic sphere-equivalent radius of each tracked particle. Additionally, fluorescence filters can be used for detection of particle-associated fluorescence moieties channels. Website for the platform we used: <https://www.particle-metrix.de/en/particle-metrix>

Microfluidic resistive pulse sensing (MRPS) counts and sizes particles as they pass through a pore between microfluidic chambers. Occlusion of the pore results in a measurable change in electrical signal (defining an event) that is proportional to the volume of the particle. Often, this technique uses different disposable cartridge pore sizes to detect particle populations within specific size ranges. As a non-optical technology, fluorescence detection is not available. Website for the platform we used: <https://nanoparticleanalyzer.com/>

Nanoflow cytometry measurement (NFCM) is a flow-based technique that detects nano-sized particles by scatter and/or fluorescence. Compared with traditional flow cytometry, a smaller flow channel reduces background signal, and lower system pressure increases dwell time of particles for enhanced signal integration. Website for the platform we used:

<http://www.nanofcm.com/products/flow-nanoanalyzer>

107

108 **MATERIALS AND METHODS**

109

110 *Please see Table 1 for manufacturer, part number, and (where applicable) dilution of reagents.*

111 *Certain commercial equipment, instruments, and reagents are identified in this paper to foster*

112 *understanding. Such identification does not imply recommendation or endorsement by the*

113 *National Institute of Standards and Technology or any other entity, nor does it imply that the*

114 *materials or equipment identified are necessarily the best available for the purpose.*

115

116 **Particle Preparation:** Human cells lines H9 (T lymphocytic) and U937 (pro-monocytic) were  
117 obtained from the American Type Culture Collection (ATCC). Cells were maintained in Roswell  
118 Park Memorial Institute (RPMI) 1640 Medium supplemented with either replete or EV-depleted  
119 10% heat-inactivated fetal bovine serum, with 1% HEPES buffer, 1% Penicillin-Streptomycin,  
120 and 1% L-Glutamine. Cells were cultured at 37°C in 5% CO<sub>2</sub>. Silica spheres (SS) were obtained  
121 from NanoFCM (Nottingham, England) as a premixed combination of diameters 68 nm, 91 nm,  
122 113 nm, and 151 nm. Individual polystyrene spheres (PS) were purchased at diameters 70 nm, 90  
123 nm, 122 nm, and 152 nm. Equal concentrations (1 × 10<sup>12</sup> particles/mL) of beads were mixed.

124

125 **Size Exclusion Chromatography (SEC):** 60 mL of conditioned culture medium (CCM) from  
126 each cell line was centrifuged at 1,000 × g for 5 minutes at 4°C to remove cells and cellular  
127 debris. 3 kDa molecular weight cut off (MWCO) Centricon Plus-70 centrifugal filters (Millipore  
128 Sigma) were used to concentrate the initial volume to 1.5 mL. Size exclusion chromatography  
129 (SEC) was done with qEV Automated Fraction Collectors (AFC; Izon Science, Cambridge, MA)  
130 and qEV original 70 nm columns (Izon Science, Cambridge, MA). Columns were left at room

131 temperature for 30 minutes and washed with phosphate-buffered saline (PBS). EVs were loaded  
132 onto the column, and 0.5 mL fractions were collected by adding additional PBS to the column.  
133 EV enriched fractions (SEC; fractions 7-9) were pooled and further concentrated using 3 kDa  
134 MWCO Amicon Ultra-15 Centrifugal Filters to a final volume of 1 mL. 50  $\mu$ L aliquots were  
135 stored at  $-20^{\circ}\text{C}$  for downstream assays.

136

137 **Differential Ultracentrifugation (dUC):** 60 mL of CCM from each cell line was centrifuged at  
138  $1,000 \times g$  for 5 minutes at  $4^{\circ}\text{C}$  to remove cells and cellular debris and  $2,000 \times g$  for 10 minutes at  
139  $4^{\circ}\text{C}$  to remove additional debris. The supernatant was transferred to polypropylene thin-wall  
140 ultracentrifugation (UC) tubes and centrifuged at  $10,000 \times g$  for 30 minutes at  $4^{\circ}\text{C}$  using a  
141 swinging bucket rotor (Thermo Scientific rotor model AH-629, k-factor 242, acceleration and  
142 deceleration settings of 9) to pellet large EVs. Supernatant was transferred into new  
143 polypropylene thin wall UC tubes and centrifuged at  $100,000 \times g$  for 70 minutes at  $4^{\circ}\text{C}$  using the  
144 same swinging bucket rotor. The 100K pellets containing small EVs were resuspended in 1 mL  
145 of PBS, vigorously vortexed, and placed on ice for 20 minutes. 50  $\mu$ L aliquots were stored at -  
146  $20^{\circ}\text{C}$  for downstream assays.

147

148 **Transmission Electron Microscopy (TEM):** 10  $\mu$ L freshly thawed aliquots were adsorbed to  
149 glow-discharged carbon-coated 400 mesh copper grids by flotation for 2 minutes. Grids were  
150 quickly blotted and rinsed by flotation on 3 drops (1 minute each) of  $1\times$  Tris-buffered saline.  
151 Grids were negatively stained in 2 consecutive drops of 1% uranyl acetate (UAT)  
152 with tylose (1% UAT in deionized water ( $\text{dH}_2\text{O}$ ), double filtered through a  $0.22 \mu\text{m}$  filter),  
153 blotted, then quickly aspirated to cover the sample with a thin layer of stain. Grids were imaged



154 on a Hitachi 7600 TEM operating at 80 kV with an AMT XR80 CCD (8 megapixel). SS and PS  
155 were absorbed to grids as above, but with initial flotation for 5 minutes and imaging on a Phillips  
156 CM-120 TEM operating at 80 kV with an AMT XR80 CCD (8 megapixel).

157

158 **Western Blot (WB):** H9 and U937 cell pellets and isolated EVs were lysed in 1×  
159 radioimmunoprecipitation assay buffer (RIPA) supplemented with protease inhibitor cocktail.  
160 Protein quantification of cell and EV lysates was done using a bicinchoninic acid assay (BCA)  
161 (Pierce BCA Protein Assay Kit). 5 µg of lysates were resolved using a 4% to 15% Criterion  
162 TGX Stain-Free Precast gel, then transferred onto an Immuno-Blot PVDF membrane. Blots were  
163 probed using primary antibodies in PBS-T and 5% Blotting Grade Blocker. Primary antibodies  
164 included anti-CD81, anti-CD63, anti-CD9, anti-TSG101, anti-BiP/GRP78, and anti-GM130.  
165 Rabbit anti-mouse IgGk BP-HRP and Mouse anti-rabbit IgGk BP-HRP were used as secondary  
166 antibodies. SuperSignal West Pico PLUS Chemiluminescent Substrate was used for detection  
167 and blots were visualized with an iBright Western Blot (Thermo Fisher, Waltham, MA) imaging  
168 system.

169

170 **Single Particle Interferometric Reflectance Imaging (SP-IRIS):** Measurements were  
171 performed largely as described previously [18,19]. 35 µL of H9 and U937 EVs isolated by SEC  
172 or dUC were diluted 1:1 in incubation buffer (IB) and incubated at room temperature  
173 on ExoView R100 (NanoView Biosciences, Brighton, MA) chips printed with anti-human CD81  
174 (JS-81), anti-human CD63 (H5C6), anti-human CD9 (HI9a), and anti-mouse IgG1 (MOPC-21).  
175 After incubation for 16 hours, chips were washed with IB 4 times for 3 minutes each under  
176 gentle horizontal agitation at 500 rpm. Chips were then incubated for 1 hour at room temperature

177 with a fluorescent antibody cocktail of anti-human CD81 (JS-81, CF555), anti-human CD63  
178 (H5C6, CF647), and anti-human CD9 (HI9a, CF488A) at a dilution of 1:1200 (v:v) in a 1:1 (v:v)  
179 mixture of IB and blocking buffer. The buffer was then exchanged to IB only, followed by 1  
180 wash with IB, 3 washes with wash buffer, and 1 wash with rinse buffer (3 minutes each at 500  
181 rpm). Chips were immersed twice in rinse buffer for approximately 5 seconds each and removed  
182 at a 45-degree angle to allow the liquid to vacate the chip. All reagents and antibodies were  
183 supplied by NanoView Biosciences (Brighton, MA, Cat #EV-TETRA-C). Both SS and PS were  
184 diluted in dH<sub>2</sub>O to load 10,000 particles, nominally, per antibody capture spot on  
185 the ExoView chips. 35  $\mu$ L of diluted spheres were incubated on ExoView chips and allowed to  
186 fully dry. All chips were imaged in the ExoView scanner (NanoView Biosciences, Brighton,  
187 MA) by interferometric reflectance imaging and fluorescent detection. Data were analyzed  
188 using NanoViewer 2.8.10 Software (NanoView Biosciences). Fluorescent cutoffs were as  
189 follows: CF555 channel 230, CF488 channel 475, CF647 channel 250 (biological particles) and  
190 CF555 channel 675, CF488 channel 600, and CF647 channel 375 (SS and PS).

191  
192 **Nanoparticle Tracking Analysis (NTA):** ZetaView QUATT-NTA Nanoparticle Tracking-  
193 Video Microscope PMX-420 and BASIC NTA-Nanoparticle Tracking Video Microscope PMX-  
194 120 (Particle Metrix, Inning am Ammersee, Germany) instruments were used for particle  
195 quantification in both scatter and fluorescence (488 nm) modes. All calibration beads were  
196 diluted using distilled water, and all samples were diluted in PBS to a final volume of 1 mL.  
197 Calibration was done for both scatter and fluorescence measurements. For scatter-mode  
198 calibration, 100 nm PS were diluted 1:250,000 (v:v). Capture settings were: sensitivity 65,  
199 shutter 100, minimum trace length 10. Cell temperature was maintained at 25°C for all

200 measurements. For fluorescence calibration, 488 nm yellow-green FluoSpheres were diluted  
201 1:250,000 (v:v), and both scatter and fluorescence were measured. Scatter was recorded as  
202 above, and fluorescence was measured at sensitivity 80, shutter 100, and minimum trace length  
203 15. For H9 and U937 EVs isolated by SEC or dUC, one cycle was performed by scanning 11 cell  
204 positions. Capture was done at medium video setting corresponding to 30 frames per position.  
205 PE-conjugated mouse anti-human CD81 and AF488-conjugated mouse anti-human CD63 were  
206 used for fluorescence detection of EVs. Antibodies were mixed 1:9 (v:v) with PBS, incubated 2  
207 hours at room temperature, and diluted to a final volume of 1 mL. For SS and PS mixtures,  
208 samples were diluted such that at least 200 particles could be counted per frame. Technical  
209 triplicates were measured for each sample. A washing step was done between each measurement  
210 using dH<sub>2</sub>O. ZetaView Software 8.5.10 was used to analyze the recorded videos with the  
211 following settings: minimum brightness 30, maximum brightness 255, minimum area 10, and  
212 maximum area 1000. Supplementary Table 1 lists all antibodies tested with this platform.

213

214 **Microfluidic Resistive Pulse Sensing (MRPS):** Microfluidics resistive pulse sensing  
215 measurements were conducted using the nCS1 instrument (Spectradyne, Torrance, CA) as  
216 described previously [18]. Sample volumes of a few  $\mu$ L of H9 and U937 EVs isolated by SEC or  
217 dUC were diluted with an equal volume of 1% polysorbate 20 (Tween 20) in 1 $\times$  PBS (PBST)  
218 and further diluted with 1 $\times$  PBS, and loaded onto polydimethylsiloxane cartridges (diameter  
219 range 65 nm to 400 nm). Approximately 5  $\mu$ L of the diluted sample was used and about 25,000  
220 events were recorded for each analyte. SS and PS were diluted 100-fold by volume in dH<sub>2</sub>O,  
221 then 10-fold by volume with equal volumes of PBST and the remainder with 1 $\times$  PBS and loaded  
222 onto TS-400 polydimethylsiloxane cartridges. Approximately 3,000 events were obtained for

223 each SS and PS repeat. All acquired results were analyzed using the nCS1 Data Analyzer  
224 (Spectradyne, Torrance, CA). For all samples, user-defined filtering was applied by defining 2D  
225 polygonal boundaries based on transition time and diameter to exclude false positive signals,  
226 similar to gating commonly used in analyzing flow cytometry data.

227

228

229 **Nano-Flow Cytometry Measurement (NFCM):** The nFCM flow nano-Analyzer was used to  
230 measure concentration and size of particles following the manufacturer's instructions and as  
231 described previously [20]. Briefly, two single photon-counting avalanche photodiodes (APDs)  
232 were used for the simultaneous detection of side scatter (SSC) and fluorescence of individual  
233 particles. The instrument was calibrated separately for concentration and size using 200 nm PE-  
234 and AF488 fluorophore-conjugated PS beads and a Silica Nanosphere Cocktail, respectively.  
235 20  $\mu$ L of each EV preparation was incubated with 20  $\mu$ L PE-conjugated CD81 and 5  $\mu$ L AF488-  
236 conjugated CD63 antibodies at 37°C for 30 minutes. After incubation, the mixture was washed  
237 twice with PBS and centrifuged at  $110,000 \times g$  for 70 min at 4°C (TH-641 rotor, k-factor 114,  
238 Thermo Fisher, using thin-wall polypropylene tubes with 13.2 ml capacity and acceleration and  
239 deceleration settings of 9). The pellet was resuspended in 50  $\mu$ L PBS. Events were recorded for 1  
240 minute. Using the calibration curve, the flow rate and side scattering intensity were converted  
241 into corresponding particle concentrations and size.

242

243

244 **Table 1**

| <b>Antibodies</b>                                                                    | <b>Manufacturer</b>                | <b>Cat #</b> | <b>Dilution</b> |
|--------------------------------------------------------------------------------------|------------------------------------|--------------|-----------------|
| Primary Anti-CD81                                                                    | Santa Cruz, Dallas, TX             | sc-7637      | 1:500           |
| Primary Anti-CD63                                                                    | BD Pharmigen, San Diego, CA        | 556019       | 1:1000          |
| Primary Anti-CD9                                                                     | BioLegend, San Diego, CA           | 312102       | 1:1000          |
| Primary Anti-TSG101                                                                  | AbCam, Cambridge, MA               | ab125011     | 1:1000          |
| Primary Anti-BiP/GRP78                                                               | BD Pharmigen, San Diego, CA        | 619078       | 1:500           |
| Primary Anti-GM130                                                                   | AbCam, Cambridge, MA               | ab52649      | 1:400           |
| Secondary Mouse Anti-Rabbit IgG BP-HRP                                               | Santa Cruz, Dallas, TX             | sc-2357      | 1:5000          |
| Secondary Rabbit Anti-Mouse IgGk BP-HRP                                              | Santa Cruz, Dallas, TX             | 516102       | 1:5000          |
| PE-Conjugated Mouse Anti-Human CD81                                                  | BD Biosciences, Franklin Lakes, NJ | 555676       | n/a             |
| AF488-Conjugated Mouse Anti-Human CD63                                               | Novus Biologicals, Littleton, CO   | NBP2-42225   | n/a             |
| <b>Reagents</b>                                                                      | <b>Manufacturer</b>                | <b>Cat #</b> |                 |
| 3K MWCO Centricon Plus-70                                                            | Millipore Sigma                    | UFC700308    |                 |
| 3K MWCO Amicon Ultra-15                                                              | Millipore Sigma                    | UFC900396    |                 |
| Blotting Grade Blocker                                                               | Bio-Rad                            | 170-6404     |                 |
| Carbon Coated 400 Mesh Copper Grids                                                  | Electron Microscopy Science        | CF400-Cu-UL  |                 |
| Criterion TGX Stain-Free Precast Gel                                                 | Bio-Rad                            | 5678084      |                 |
| Distilled Water                                                                      | Gibco                              | 15230-162    |                 |
| FluoSpheres Carboxylate-Modified Microspheres, 0.1 $\mu$ m, Yellow Green Fluorescent | Thermo Scientific                  | F8803        |                 |
| H9 Cell Line                                                                         | American Type Culture Collection   | HTB-176      |                 |
| Heat-Inactivated Fetal Bovine Serum                                                  | GE Healthcare                      | SH30396.03   |                 |
| Heat-Inactivated Fetal Bovine Serum, Exosome-Depleted                                | Gibco                              | A2720801     |                 |
| HEPES buffer                                                                         | Gibco                              | 15630080     |                 |
| Immuno-Blot PVDF Membrane                                                            | Bio-Rad                            | 1620177      |                 |
| L-Glutamine                                                                          | Gibco                              | 25030081     |                 |
| Open-Top Thin Wall Ultra-Clear Tubes                                                 | Beckman Coulter                    | 344091       |                 |
| Penicillin-Streptomycin                                                              | Gibco                              | 15140122     |                 |

|                                                       |                                  |             |
|-------------------------------------------------------|----------------------------------|-------------|
| Phosphatidylserine Beads                              | NanoFCM                          | S16M-Exo    |
| Phosphate-Buffered Saline (PBS)                       | Gibco                            | 14190-144   |
| Pierce BCA Protein Assay Kit                          | Thermo Scientific                | 23225       |
| Polypropylene Ultracentrifugation (UC) Tubes          | Sorvall                          | 03-141      |
| Polystyrene Spheres 147 nm                            | Thermo Scientific                | 3150A       |
| Polystyrene Spheres 125 nm                            | Thermo Scientific                | 3125A       |
| Polystyrene Spheres 100 nm                            | Thermo Scientific                | 3100A       |
| Polystyrene Spheres 70 nm                             | Thermo Scientific                | 3070A       |
| Polystyrene Spheres 90 nm                             | Thermo Scientific                | 3090A       |
| Protease Inhibitor Cocktail                           | Millipore Sigma                  | 11697498001 |
| RIPA                                                  | Cell Signaling Technology        | 9806        |
| Roswell Park Memorial Institute (RPMI) 640 Medium     | Gibco                            | 11875093    |
| Silica Nanosphere Cocktail                            | NanoFCM                          | n/a         |
| SuperSignal West Pico PLUS Chemiluminescent Substrate | Thermo Scientific                | 34577       |
| Swinging Bucket Rotor AH-629                          | Thermo Scientific                | 54284       |
| Tris Buffered Saline (TBS)                            | Bio-Rad                          | 1706435     |
| Tween-20                                              | Millipore Sigma                  | P7949       |
| U937 Cell Line                                        | American Type Culture Collection | CRL-1593.2  |
| Ultra-Pure Distilled Water                            | Invitrogen                       | 10977015    |
| Uranyl Acetate                                        | Polysciences                     | 2144725     |

245  
246  
247  
248

249 **RESULTS**

250

251 **Production, separation, and quality control of input materials**

252 Supernatants were collected from cultured human cell lines: H9 (T-lymphocytic) and U937 (pro-  
253 monocytic). EVs were separated by size exclusion chromatography and ultrafiltration or  
254 differential ultracentrifugation (Figure 1A). Marker expression and morphology were assessed  
255 by WB (Figure 1B and Supplementary Figure 1) and TEM. WB revealed characteristic CD63  
256 and CD81 expression patterns, with CD81 above the limit of detection only for H9 (Figure 1B).  
257 Heterogeneous EV populations were observed by TEM in each sample preparation method  
258 (Figure 1C). Additionally, we confirmed size and purity of silica spheres and polystyrene spheres  
259 using TEM (Figure 1D).

260

261 **Artificial nanoparticle sizing**

262 Mixed silica spheres (SS) with nominal diameters of 68 nm, 91 nm, 113 nm, and 151 nm were  
263 measured with the four platforms. Please note that since the SP-IRIS technology uses affinity to  
264 capture particles, we dried particle mixtures onto the surface of the SP-IRIS chips before  
265 imaging. SP-IRIS identified four distinct populations with diameter modes around 75 nm, 100  
266 nm, 120 nm, and 150 nm (Figure 2A). NTA detected a broad population distribution with a mode  
267 around 105 nm diameter (Figure 2B). MRPS resolved four distinct peaks for each individual  
268 chip, but this distinction was masked somewhat by averaging all results (Figure 2C; see also  
269 Supplementary Figure 2). NFCM resolved four populations with distinct peaks at diameters of  
270 approximately 66 nm, 85 nm, 112 nm, and 154 nm (Figure 2D). Polystyrene spheres (PS) with  
271 nominal diameters 70 nm, 90 nm, 122 nm, and 152 nm were mixed to a nominal concentration of  
272  $1 \times 10^{12}$  particles/mL. SP-IRIS detected four distinct peaks around 80 nm, 110 nm, 140 nm, and

273 170 nm (Figure 2E). NTA returned a broad population distribution centered around 105 nm  
274 (Figure 2F). MRPS identified distinct peaks at diameters 71 nm, 92 nm, 123 nm, and 150 nm  
275 (Figure 2G). For PS, nano-flow showed four populations around 85 nm, 120 nm, 170 nm, and  
276 225 nm in diameter, as well as a possible smaller population around 60 nm (Figure 2H).

277

### 278 **Artificial nanoparticle counting**

279 In addition to particle size, we also assessed counts. For SP-IRIS, a mean of around 3000 SS  
280 particles were detected per printed antibody spot (Figure 3A), with no overall differences  
281 between groups of antibody spots (*i.e.*, three spots per chip each of three tetraspanins and an  
282 isotype control; note that no differences would be expected, since particles were dried onto the  
283 chips). However, per-spot events overall ranged from <2000 SS particles per spot to >4500 SS  
284 particles per spot (Figure 3A). SP-IRIS performed similarly for PS. There were no differences  
285 between antibody groups, with a mean of around 1400 events/antibody spot (Figure 3B), but  
286 events per spot ranged from <1000 PS particles/spot to 3000 PS particles/spot. Interestingly,  
287 based on the nominal PS bead concentration and the surface area of the chips and spots, 10,000  
288 particles per spot would be expected (Figure 3B, dotted line). Following SP-IRIS measurements,  
289 chips were probed with three fluorescently labeled antibodies (anti-CD81, anti-CD63, and anti-  
290 CD9) to assess background binding. Background binding was negligible for both SS and PS  
291 (Supplementary Figure 3A and B, respectively). Some outliers were observed for CD9 (SS) or  
292 CD63 (PS); however, none exceeded 1000 events. Particle concentrations were also measured by  
293 NTA, MRPS, and NFCM. For SS (Figure 3C), MRPS estimated a concentration approximately  
294 one log higher than NTA ( $5.1 \times 10^{11}$  particles/mL vs.  $5.4 \times 10^{10}$  particles/mL, respectively), with  
295 NFCM in the middle ( $1.7 \times 10^{11}$  particles/mL). For PS, all three methods were in close agreement



296 (Figure 3D). Furthermore, the measured concentration was very close to the nominal PS  
297 concentration of  $1 \times 10^{12}$  particles/mL (Figure 3D, dotted line).

298

### 299 **Biological particle sizing**

300 EV preparations from H9 and U937 cell supernatants enriched by ultrafiltration and SEC (SEC  
301 EVs) or by differential ultracentrifugation (100K EVs) were next measured using each platform.  
302 For H9-derived materials, SP-IRIS returned an almost identical size distribution profile for both  
303 EV enrichment methods (Figure 4A). In contrast, NTA, MRPS, and NFCM measured more  
304 particles at smaller diameters for the 100K EVs compared with the SEC EVs with roughly  
305 similar particle size distributions (Figure 4B-D). However, substantial variation between  
306 replicates might limit the conclusions that can be drawn from this observation. For U937-derived  
307 materials, SP-IRIS and NTA (Figure 4E,F) detected more particles at smaller diameters from the  
308 100K EVs compared with the SEC-EVs, again with roughly similar particle size distribution.  
309 MRPS produced equivalent particle size distribution and particle number between the two  
310 enrichment techniques (Figure 4G ). In contrast, NFCM detected a higher particle count of  
311 smaller particle diameters from the SEC EVs than the 100K EVs, with the particle size  
312 distributions significantly different. Again, variability between replicates limits conclusions.  
313 Overall, the results are broadly consistent with the reported power-law size distribution of EVs  
314 [21,22] and the expectation that UC pellets may contain non-EV extracellular particles (EPs)  
315 around the same size as EVs [1].

316

### 317 **Biological particle counting**

318 Particle counts were next assessed. As before, we present the SP-IRIS data separately because  
319 this platform does not provide an overall count, but rather a number of events detected on chips  
320 printed with antibodies (shown here: to CD81 and to CD63 plus an isotype control). Consistent  
321 with protein assay results, SP-IRIS shows that more H9 particles were captured by anti-CD81  
322 than by anti-CD63 (Figure 5A) and that U937 particles could be captured by CD63 capture  
323 antibodies and not CD81 capture antibodies (Figure 5B). For the remaining three platforms,  
324 which measure overall concentration, several trends were apparent (Figure 5C,D). First, for both  
325 the H9 and the U937 source, and for both EV separation methods, data were consistent with the  
326 results of SS counting in that NTA, NFCM, and MRPS measurements ordinarily ranked from  
327 lowest particles/mL to highest particles/mL. Secondly, MRPS and NFCM measured greater  
328 particle concentrations for 100K EVs than for SEC EVs (corrected for processing and dilution),  
329 although NTA results were similar. Finally, this is in contrast to results for the PS particles,  
330 where the three techniques produced equivalent particle counts.

### 331 332 **Single particle phenotyping by fluorescence**

333 The SP-IRIS results represent a type of single-particle phenotyping since diameter is measured  
334 for individual particles captured by antibodies and thus putatively positive for an antigen.  
335 Captured particles can additionally be probed with fluorescently labeled antibodies. For chips  
336 incubated with H9 EVs (Figure 6A,B), EVs captured by CD81 were generally positive for CD81  
337 by fluorescence, and many also appeared to be CD63 positive. In contrast, CD63 capture spots  
338 were largely devoid of fluorescence, as were (most) control capture spots. For chips incubated  
339 with U937 EVs (Figure 6C,D), events on CD63 capture spots were also positive for CD63 by  
340 fluorescence. CD81-linked fluorescence was at background levels for all spots. Note that  
341 numbers of “positive” events are higher in fluorescence mode than with SP-IRIS (Figure 5A,B),

342 likely, as discussed later, because fluorescence detection is more sensitive than reflectance  
343 imaging.

344 For the two remaining platforms with fluorescence capabilities, NTA and NFCM, results are  
345 shown as percent of total particles (Figure 6E-H). Approximately 40% to 50% of detected  
346 particles from H9 cells were positive for CD81 according to fluorescent NTA, while little to no  
347 CD81 signal was detected for U937 materials, consistent with protein assay results. However, we  
348 could not detect CD63-linked signal by fluorescent NTA for any sample. In contrast, NFCM  
349 detected either CD81 or CD63 on a small percentage of particles. The percentages were similar  
350 for the two tetraspanins for H9-derived particles. For U937 material, CD63-positive particles  
351 were more abundant than CD81-positive particles. No major differences between the SEC and  
352 100K separation methods were apparent according to these data (Figure 6E-H).

353

354

355 **DISCUSSION**

356

357 This study evaluated the abilities of four orthogonal technology platforms to size, count, and/or  
358 phenotype biological EVs and synthetic nanoparticles. Three of the technologies—SP-IRIS,  
359 NTA, and NFCM—are optical in nature and can perform some form of  
360 phenotyping/fluorescence analysis, while the other, MRPS, is an electric sensing platform that  
361 we did not attempt to apply to particle phenotyping. Although numerous comparisons of EV  
362 characterization platforms have been published previously [15,23–26], this study includes  
363 NFCM and MRPS and focuses in part on single-particle phenotyping.

364

365 ***Detected particles: size-range sensitivity and refractive index matter.*** Whereas NTA, MRPS,  
366 and NFCM accurately and consistently measured the concentration of a known mixture of  
367 polystyrene particles, estimates of the number of silica particles varied substantially. NTA  
368 measured approximately 10-fold fewer SS particles than MRPS, while NFCM measured ~ 3-fold  
369 fewer SS particles than MRPS. Since SS have a lower refractive index ( $n_{SS} \sim 1.42$  [27]) than PS  
370 ( $n_{PS} \sim 1.59$  [28]), one might predict that a mixture of EVs, with an even lower refractive index  
371 than silica [23,29], would have an even larger range of measurements. Indeed, for EV  
372 preparations, average counts by NTA and MRPS varied by between one and two orders of  
373 magnitude. These outcomes emphasize that each platform has an effective range of measurement  
374 that may change with properties of particle populations, especially refractive index. Thus,  
375 differences in output in part reflect different or overlapping particle populations that can be  
376 detected by the specific technologies, as indeed reported previously for several of these  
377 technologies [30]. That is, NTA and MRPS are similarly capable to detect a wide range of PS  
378 particle sizes. However, NTA may detect a more limited range of biological particles [31] than

379 the MRPS platform using a small pore-size cartridge, in that MRPS may detect more of the  
380 smaller EVs along the power-law distribution. Signal for NTA scales with radius to the 6<sup>th</sup>  
381 power, whereas signal scales for MRPS with radius to the 3<sup>rd</sup> power; thus, because of finite  
382 dynamic range, NTA will be biased to detecting fewer of the small particles in a sample  
383 compared with MRPS.

384

385 *Is it important to resolve different particle size populations?* SP-IRIS, MRPS, and NFCM could  
386 resolve up to four populations of synthetic nanoparticles with different diameters. We note that  
387 distinct populations were somewhat obscured when MRPS results were averaged for SS, but not  
388 for PS – see Supplementary Figure 4 – which may reflect aggregation of the SS due to the  
389 electrolyte solution (PBS) required for MRPS and the convolution of experimental uncertainties  
390 in particle concentration and size measurements. Also noteworthy is that the NFCM platform  
391 distinguished subpopulations of SS particles, but that this is likely because the same beads are  
392 used to calibrate the instrument. While detecting the expected concentration of high refractive  
393 index PS particles, NTA was unable to resolve individual particle populations and instead  
394 characterized the SS particles as a broad population distribution centered on an “average” size.  
395 To be sure, it may be possible to resolve discretely sized particle populations using NTA with  
396 mixtures at different ratios of sizes. We could not do so with the mixtures we used. Whether this  
397 matters for biological particles is unclear. It does not seem that biological samples would contain  
398 unique EV subpopulations with exquisitely defined sizes, except perhaps for samples from  
399 sources infected with specific enveloped viruses. NTA does seem to be capable of detecting  
400 shifts in population distributions, and this capability might be more important for biological  
401 particles than resolving subpopulations.

402

403 ***On counting by SP-IRIS/fluorescence.*** One clear finding of our study is that, in our hands,  
404 neither SP-IRIS label-free measurements nor subsequent fluorescence detection could be used  
405 directly to estimate overall particle concentration. Instead, SP-IRIS is best used to understand  
406 ratios within populations and for single-particle phenotyping. Even when PS beads were dried  
407 onto chips, the measured concentration was approximately one-seventh of the expected  
408 concentration. While uneven drying could contribute, it seems that PS particles non-specifically  
409 adhered to the chip without a washing step, were undercounted slightly. For biological particles,  
410 the problem is compounded since only a subset of EVs bind to any given affinity reagent “spot.”  
411 Binding is determined by diffusion (which is slow for EVs), presence and density of recognized  
412 surface markers, and affinity characteristics of antibody-to-antigen binding. The bound  
413 population of particles remaining after wash steps is only a miniscule proportion of the total in  
414 the input material and cannot be used to determine overall concentration. Interestingly,  
415 fluorescence results often indicated higher particle concentrations than returned by label-free  
416 counting, even though particles positive for a particular antigen are expected to be only a subset  
417 of the captured population (different antigens) or to approach equality (if the capture antigen is  
418 targeted and antigen is abundant). Counts are higher because fluorescence detection is more  
419 sensitive than label-free. That is, fluorescence detects positive particles that may be below the  
420 limit of label-free detection.

421

422 ***Did any platforms identify differences between EV separation technologies?*** For both  
423 biological sources of EVs, we used two methods of EV separation: dUC (100K EVs), which has  
424 been the most common method for EV separation [32,33], and a combination of filtration and

425 size exclusion chromatography (SEC EVs) [34,35]. According to some evidence in the literature,  
426 dUC leads to more protein contamination and aggregation and damage of EVs [36–38]. It should  
427 be noted that alternative viewpoints can also be found [16]. However, protein particle  
428 contamination might be expected to introduce more and smaller particles. This outcome is indeed  
429 observed based upon TEM background and particle profile shifts towards smaller particles for  
430 several of the platforms. For SP-IRIS with fluorescence, it is also interesting that tetraspanin  
431 positivity is higher for samples obtained by SEC than with dUC. On the other hand, evidence of  
432 aggregation by dUC is not apparent in the data presented here. We cannot rule out aggregation,  
433 however, only that the techniques used here did not appear to detect it.

434

435 ***Single-particle phenotyping.*** For the three techniques with single-particle phenotyping  
436 capabilities (SP-IRIS, NTA, and NFCM), each has advantages and drawbacks, as covered above,  
437 all can potentially provide true single-particle phenotyping data. SP-IRIS was able to achieve the  
438 most “multiplexed” detection, in that signal could be obtained above background for up to three  
439 fluorescent channels. At the time of our evaluations, the NTA platform we used could not  
440 perform simultaneous multi-channel measurements and thus was not a true single-particle  
441 multiplexing platform. Instead, sequential filter switches were required, such that the same  
442 particles could not be tracked in different channels.

443

444 In Table 2, we attempt to summarize our findings and views about the four investigated  
445 techniques. **Detectable size ranges** for biological particles: these should be considered to be  
446 rough estimates. If we accept the assumption that EVs follow a power-law size distribution (the  
447 smaller, the more abundant, with lower bounds defined by membrane curvature constraints), then

448 no evaluated platform effectively detects the very smallest particles. However, SP-IRIS, MRPS,  
449 and NFCM appear to detect slightly smaller particles than NTA under the conditions and settings  
450 we tested. For NTA, MRPS, and NFCM, linear ranges for **particle concentration** for all  
451 instruments begin around  $1 \times 10^7$  particles/mL and extend from about one order of magnitude  
452 (NTA) to multiple orders of magnitude (MRPS). This spread is important, since the wider the  
453 range, the fewer time-consuming concentrations or dilutions must be done to place an unknown  
454 particle population into the measurable range. SP-IRIS is a special case, since particles are  
455 captured by affinity, and overall concentration cannot easily be estimated. In our hands, particle  
456 concentrations must be high ( $\gg 1 \times 10^7$  particles /mL) even for abundant antigens. Furthermore,  
457 the optimal captured particle counts are roughly 3000 to 6000 per antibody spot (although this  
458 may vary). To hit a very tight "sweet spot", many trial dilutions may be needed. Furthermore, the  
459 optimal dilution may well be different for different antibodies on the chip because of different  
460 percentages of EVs positive for a particular antigen, per-EV antigen abundance, and antibody  
461 performance. Hence, dilutions are usually most important and time-consuming for SP-IRIS.  
462 Related to dilution is the **volume of input material** required for a single reading. Assuming each  
463 platform can measure  $1 \times 10^7$  particles per mL, the required volume of a dilution at this  
464 concentration ranges from 5 ul (MRPS) to around 1 mL (NTA). Of course, the actual  
465 volume/number of EVs needed will also depend on the number of concentrations/dilutions  
466 required to reach the measurable concentration range. The input volume difference is also  
467 inconsequential for highly abundant materials, but may be important for low-abundance EV  
468 samples. **If done, optional calibration steps** are rapid for NTA and MRPS (around 20 minutes).  
469 For NFCM, we find that calibration can be as short as 20 minutes but can sometimes take longer.  
470 Time for sample dilutions is most difficult to estimate, but is expected to correlate inversely with



471 the range of measurement for each platform. **Read time** ranges from five minute to about half an  
472 hour per sample. Note that the times we indicate are for sizing and counting only. Optional  
473 fluorescence measurements for the relevant platforms would in some cases add processing time  
474 for antibody incubations and removal, as well as for read times (except for NFCM). For SP-IRIS,  
475 we should also note that, although the total hands-on and read time is longer than for other  
476 techniques, each reading includes on-chip replicates, multiple capture antibodies, and up to three  
477 fluorescence readouts per capture antibody.

478

479 **Costs** for the platforms include initial outlay, disposable costs, and maintenance costs. For  
480 acquisition, the MRPS system is most economical, while NFCM is the most expensive. For basic  
481 counting and sizing, operating costs for NTA and NFCM are negligible. Adding optional  
482 fluorescence increases these costs by amounts that are antibody-dependent. The MRPS system  
483 uses disposable cartridges that currently cost USD 8 to USD 12 each. The SP-IRIS platform has  
484 the highest disposable costs, with each sample requiring at least one chip at USD 50 to >USD  
485 100 each. Since optimal dilutions are difficult to achieve and may be different for different  
486 capture materials on the same chip, multiple chips may be needed for the same sample. Chips  
487 also cannot be chemically stripped and re-used, at least not in our hands (Mallick and Witwer,  
488 unpublished data). Furthermore, we find that chips often go unused and are thus "wasted" as a  
489 result of a short shelf life of only several weeks. Since chips may take several weeks (or more for  
490 custom) to procure, the three-week shelf life requires excellent planning and a lack of  
491 unexpected difficulties in the laboratory; otherwise, the investment is wasted. As noted, though,  
492 under optimal conditions, the platform provides multi-dimensional information that may justify  
493 these costs and logistical challenges for some users. We should also mention that chips for the

494 SP-IRIS and MRPS instruments are currently available only from the instrument manufacturer  
495 for that particular measurement technique. As for maintenance costs, we are unable to estimate  
496 them at this time.

497

498 **In conclusion:**

499 • No evaluated platform is necessarily “better” or “worse” than others; rather, it is  
500 important to be aware of the capabilities of each platform with respect to each particle  
501 population of interest.

502 • Rather than relying on a single platform, consider using orthogonal technologies.

503 • Both acquisition and recurring costs should be considered before acquiring a platform.

504 Appropriate reference materials are needed for better evaluation of single particle phenotyping  
505 capabilities, including multiplexed phenotyping.

506

507

508

509 **FIGURE LEGENDS**

510

511 **Figure 1: Methodology and EV separation.** (A) EVs were isolated from H9 and U937  
512 conditioned cell media by a combination of ultrafiltration and size exclusion chromatography  
513 (SEC EVs) or by differential ultracentrifugation (100K EVs). (B) Immunoblot analysis of  
514 isolated EVs as well as corresponding cell lysates from H9 and U937 using antibodies specified  
515 in Table 1; see also Supplementary Figure 1. (C) Electron microscopy images of SEC EV and  
516 100K EV samples from both cell lines. Leftmost scale bars 500 nm and magnification 40 000×;  
517 rightmost scale bars 100 nm and magnification 100 000×. (D) EM of SS and PS. Leftmost scale  
518 bars 500 nm and magnification 17 500×; rightmost scale bars 100 nm and magnification 65  
519 000×.

520

521 **Figure 2: SS and PS size distribution.** Size distributions for SS (n=3) with standard deviation  
522 for (A) SP-IRIS, (B) NTA, (C) MRPS, and (D) NFCM. Nominal SS diameters are at the vertical  
523 dotted lines: 68 nm, 91 nm, 113 nm, and 151 nm. Size distributions for PS (n=3; with SD) for (E)  
524 SP-IRIS, (F) NTA, (G) MRPS, and (H) NFCM. Nominal PS diameters are at the vertical dotted  
525 lines: 70 nm, 90 nm, 122 nm, and 152 nm. Insert in Figure 2C shows a single MRPS  
526 measurement of the size distribution.

527

528 **Figure 3: SS and PS quantification.** (A) SP-IRIS label-free capture for SS and PS using four  
529 capture spots (n=3 per group; mean particle count per spot with SD). B) SS quantification (n=3;  
530 mean particles/mL with SD). (C) PS quantification (n=3; mean particles/mL with SD). Nominal  
531 PS concentration is portrayed with a horizontal line ( $1.0 \times 10^{12}$  particles/mL).

532

533 **Figure 4: H9 and U937 particle size distribution.** Diameters of particles for H9 SEC EVs and  
534 100K EVs (n=3 per group, with standard deviation) for (A) SP-IRIS, (B) NTA, (C) MRPS, and  
535 (D) NFCM. Size distributions for U937 SEC EVs and 100K EVs (n=3 per group; with SD) for  
536 (E) SP-IRIS, (F) NTA, (G) MRPS, and (H) NFCM.

537

538 **Figure 5: H9 and U937 particle quantification.** SP-IRIS label-free capture for (A) H9 SEC  
539 EVs and 100K EVs and (B) U937 SEC EVs and 100K EVs using CD81, CD63, and mouse  
540 isotype control capture antibodies (n=3 per group; mean particle count/spot with SD). H9 and  
541 U937 particle quantification (n=3; mean particles/mL with SD) for (C) SEC EVs and (D) 100K  
542 EVs using NTA, MRPS, and NFCM.

543

544 **Figure 6: Particle phenotyping.** SP-IRIS fluorescence detection using labeled anti-CD81 and  
545 anti-CD63 after particle capture with CD81, CD63, and mouse isotype control (n=3 per group;  
546 mean and SD) for (A) H9 SEC EVs, (B) H9 100K EVs, (C) U937 SEC EVs, and (D) U937 100K  
547 EVs. Percent of particles detected with fluorescently-labeled anti-CD81 and anti-CD63 by NTA  
548 and NFCM (n=3 per group; mean and SD) for (E) H9 SEC EVs, (F) H9 100K EVs, (G) U937  
549 SEC EVs, and (H) U937 100K EVs. Asterisk. An asterisk indicates that, in the authors' view, an  
550 antibody did not perform on the instrument; it does not necessarily mean that the antibody would  
551 not perform in another context or with additional optimization.

552

553 **Supplementary Figure 1: Additional EV characterization.** (A) BCA assay results, including  
554 final protein concentrations in  $\mu\text{g/mL}$ . (B) Immunoblot analysis of separated EVs as well  
555 as corresponding cell lysates from H9 and U937 using antibodies specified in Table 1.

556

557 **Supplementary Figure 2: Individual SS measurements by MRPS.** Repeats 2 (A) and 3 (B)  
558 for SS using MRPS. Repeat 1 can also be found as an inset in Figure 2C.

559

560 **Supplementary Figure 3: SP-IRIS background fluorescence for SS and PS.** SP-IRIS  
561 fluorescence detection using fluorescently labeled anti-CD81, anti-CD63, and anti-CD9 after (A)  
562 SS and (B) PS capture with four antibody groups ( $n=3$  per group; mean and SD).

563

564 **Supplementary Figure 4: MRPS and NFCM dilution series.** SS (A) and PS (B) were diluted  
565  $2\times$ ,  $5\times$ , and  $10\times$  by volume to determine the optimal dilution for NTA analysis. SS (C) were  
566 diluted 1:1000 (v:v), 1:2000 (v:v), and 1:4000 (v:v) and PS (D) were diluted 1:2500 (v:v),  
567 1:5000 (v:v), and 1:10000 (v:v) to determine the optimal dilution for NFCM analysis. Dilution-  
568 corrected counts are for SS (E) and PS (F) on MRPS and SS (G) and PS (H) on NFCM. Optimal  
569 dilutions are indicated by green or yellow (MRPS and NFCM, respectively).

570

571 **Supplementary Table 1: Antibodies tested with fluorescent NTA.** H9 100K EVs were diluted  
572 1:1 (v:v) in PBS.  $9\ \mu\text{L}$  of diluted EVs were mixed with  $1\ \mu\text{L}$  of antibody and incubated for 2  
573 hours at room temperature. Samples were then diluted 1:1000 and measured in scatter and  
574 fluorescent modes using NTA.

575

576

577

578 **Acknowledgements:**

579 The authors thank members of the Witwer and Retrovirus Laboratories and various members of  
580 the International Society for Extracellular Vesicles for discussions and support. The Authors  
581 acknowledge NanoView Biosciences, Particle Metrix, Spectradyne, and NanoFCM  
582 representatives for discussions and for arranging demonstrations. Electron microscopy images  
583 were acquired in the Johns Hopkins University School of Medicine Institute for Basic  
584 Biomedical Sciences Microscope Facility.

585

586 **Disclosure Statement:**

587 Authors report no conflicts of interest.

588

589 **Funding:**

590 This work was supported in part by the National Institute on Drug Abuse (NIDA; R01DA040385  
591 and R01DA047807), the National Institute of Mental Health (NIMH; R21MH118164), The  
592 National Institute of Allergy and Infectious Diseases (NIAID, R01AI144997), the National  
593 Cancer Institute (NCI) and Office of the Director (UG3CA241694) and the Michael J. Fox  
594 Foundation (MJFF; Grant 00900821).

595

596 **REFERENCES**

- 597
- 598 [1] Théry C, Witwer KW, Aikawa E, et al. Minimal information for studies of extracellular  
599 vesicles 2018 (MISEV2018): a position statement of the International Society for  
600 Extracellular Vesicles and update of the MISEV2014 guidelines. *J Extracell Vesicles*  
601 2018;7:1535750.
- 602 [2] Yáñez-Mó M, Siljander PR-M, Andreu Z, et al. Biological properties of extracellular  
603 vesicles and their physiological functions. *J Extracell Vesicles* 2015;4:27066.
- 604 [3] Witwer KW, Théry C. Extracellular vesicles or exosomes? On primacy, precision, and  
605 popularity influencing a choice of nomenclature. *J Extracell Vesicles* 2019;8:1648167.
- 606 [4] Cocucci E, Meldolesi J. Ectosomes and exosomes: shedding the confusion between  
607 extracellular vesicles. *Trends Cell Biol* 2015;25:364–72.
- 608 [5] Lázaro-Ibáñez E, Lässer C, Shelke GV, et al. DNA analysis of low- and high-density  
609 fractions defines heterogeneous subpopulations of small extracellular vesicles based on  
610 their DNA cargo and topology. <https://doi.org/10.1080/2001307820191656993> 2019.
- 611 [6] Russell AE, Sneider A, Witwer KW, et al. Biological membranes in EV biogenesis,  
612 stability, uptake, and cargo transfer: an ISEV position paper arising from the ISEV  
613 membranes and EVs workshop. *J. Extracell. Vesicles*, vol. 8, Taylor and Francis Ltd.;  
614 2019.
- 615 [7] Tkach M, Kowal J, Théry C. Why the need and how to approach the functional diversity  
616 of extracellular vesicles. *Philos Trans R Soc Lond B Biol Sci* 2018;373:20160479.
- 617 [8] Lässer C, Jang SC, Lötval J. Subpopulations of extracellular vesicles and their therapeutic  
618 potential. *Mol Aspects Med* 2018;60:1–14.
- 619 [9] Lanier LL, Engleman EG, Gatenby P, et al. Correlation of functional properties of human  
620 lymphoid cell subsets and surface marker phenotypes using multiparameter analysis and  
621 flow cytometry. *Immunol Rev* 1983;74:143–60.
- 622 [10] Reddington AP, Trueb JT, Freedman DS, et al. An Interferometric Reflectance Imaging  
623 Sensor for Point of Care Viral Diagnostics. *IEEE Trans Biomed Eng* 2013;60:3276–83.
- 624 [11] Lopez CA, Daaboul GG, Vedula RS, et al. Label-free multiplexed virus detection using  
625 spectral reflectance imaging. *Biosens Bioelectron* 2011;26:3432–7.
- 626 [12] Dragovic RA, Gardiner C, Brooks AS, et al. Sizing and phenotyping of cellular vesicles  
627 using Nanoparticle Tracking Analysis. *Nanomedicine* 2011;7:780–8.
- 628 [13] Sokolova V, Ludwig AK, Hornung S, et al. Characterisation of exosomes derived from  
629 human cells by nanoparticle tracking analysis and scanning electron microscopy. *Colloids*  
630 *Surf B Biointerfaces* 2011;87:146–50.
- 631 [14] Giebel B, Helmbrecht C. Methods to analyze EVs. *Methods Mol. Biol.*, vol. 1545,  
632 Humana Press Inc.; 2017, p. 1–20.
- 633 [15] Anderson W, Kozak D, Coleman VA, et al. A comparative study of submicron particle  
634 sizing platforms: Accuracy, precision and resolution analysis of polydisperse particle size  
635 distributions. *J Colloid Interface Sci* 2013;405:322–30.
- 636 [16] Tian Y, Gong M, Hu Y, et al. Quality and efficiency assessment of six extracellular  
637 vesicle isolation methods by nano-flow cytometry. *J Extracell Vesicles* 2020;9.
- 638 [17] Tian Y, Ma L, Gong M, et al. Protein Profiling and Sizing of Extracellular Vesicles from  
639 Colorectal Cancer Patients via Flow Cytometry. *ACS Nano* 2018;12:671–80.
- 640 [18] Ahn JY, Datta S, Bandeira E, et al. Release of extracellular vesicle miR-494-3p by ARPE-  
641 19 cells with impaired mitochondria. *Biochim Biophys Acta Gen Subj* 2020:129598.



- 642 [19] Gámbaro F, Li Calzi M, Fagúndez P, et al. Stable tRNA halves can be sorted into  
643 extracellular vesicles and delivered to recipient cells in a concentration-dependent manner.  
644 RNA Biol 2019.
- 645 [20] Huang Y, Cheng L, Turchinovich A, et al. Influence of species and processing parameters  
646 on recovery and content of brain tissue-derived extracellular vesicles. J Extracell Vesicles  
647 2020;9:1785746.
- 648 [21] van der Pol E, Böing AN, Gool EL, et al. Recent developments in the nomenclature,  
649 presence, isolation, detection and clinical impact of extracellular vesicles. J Thromb  
650 Haemost 2016;14:48–56.
- 651 [22] Paulaitis M, Agarwal K, Nana-Sinkam P. Dynamic Scaling of Exosome Sizes. Langmuir  
652 2018;34:9387–93.
- 653 [23] Van Der Pol E, Coumans FAW, Sturk A, et al. Refractive index determination of  
654 nanoparticles in suspension using nanoparticle tracking analysis. Nano Lett  
655 2014;14:6195–201.
- 656 [24] Bachurski D, Schuldner M, Nguyen PH, et al. Extracellular vesicle measurements with  
657 nanoparticle tracking analysis—An accuracy and repeatability comparison between  
658 NanoSight NS300 and ZetaView. J Extracell Vesicles 2019;8.
- 659 [25] Erdbrügger U, Lannigan J. Analytical challenges of extracellular vesicle detection: A  
660 comparison of different techniques. Cytom Part A 2016;89:123–34.
- 661 [26] Corso G, Heusermann W, Trojer D, et al. Systematic characterization of extracellular  
662 vesicles sorting domains and quantification at the single molecule–single vesicle level by  
663 fluorescence correlation spectroscopy and single particle imaging. J Extracell Vesicles  
664 2019;8.
- 665 [27] García-Santamaría F, Míguez H, Ibisate M, et al. Refractive index properties of calcined  
666 silica submicrometer spheres. Langmuir 2002;18:1942–4.
- 667 [28] Kasarova SN, Sultanova NG, Ivanov CD, et al. Analysis of the dispersion of optical  
668 plastic materials. Opt Mater (Amst) 2007;29:1481–90.
- 669 [29] Gardiner C, Shaw M, Hole P, et al. Measurement of refractive index by nanoparticle  
670 tracking analysis reveals heterogeneity in extracellular vesicles. J Extracell Vesicles  
671 2014;3.
- 672 [30] van der Pol E, Coumans FAW, Grootemaat AE, et al. Particle size distribution of  
673 exosomes and microvesicles determined by transmission electron microscopy, flow  
674 cytometry, nanoparticle tracking analysis, and resistive pulse sensing. J Thromb Haemost  
675 2014;12:1182–92.
- 676 [31] Defante AP, Vreeland WN, Benkstein KD, et al. Using Image Attributes to Assure  
677 Accurate Particle Size and Count Using Nanoparticle Tracking Analysis. J Pharm Sci  
678 2018;107:1383–91.
- 679 [32] Théry C, Amigorena S, Raposo G, et al. Isolation and Characterization of Exosomes from  
680 Cell Culture Supernatants and Biological Fluids. Curr. Protoc. Cell Biol., vol. Chapter 3,  
681 Hoboken, NJ, USA: John Wiley & Sons, Inc.; 2006, p. Unit 3.22.
- 682 [33] Gardiner C, Di Vizio D, Sahoo S, et al. Techniques used for the isolation and  
683 characterization of extracellular vesicles: results of a worldwide survey. J Extracell  
684 Vesicles 2016;5:32945.
- 685 [34] Böing AN, van der Pol E, Grootemaat AE, et al. Single-step isolation of extracellular  
686 vesicles by size-exclusion chromatography. J Extracell Vesicles 2014;3:23430.
- 687 [35] Théry C, Witwer KW, Aikawa E, et al. Minimal information for studies of extracellular

- 688 vesicles 2018 (MISEV2018): a position statement of the International Society for  
689 Extracellular Vesicles and update of the MISEV2014 guidelines. *J Extracell Vesicles*  
690 2019;8:1535750.
- 691 [36] Linares R, Tan S, Gounou C, et al. High-speed centrifugation induces aggregation of  
692 extracellular vesicles. *J Extracell Vesicles* 2015;4:29509.
- 693 [37] Van Deun J, Mestdagh P, Sormunen R, et al. The impact of disparate isolation methods  
694 for extracellular vesicles on downstream RNA profiling. *J Extracell Vesicles*  
695 2014;3:24858.
- 696 [38] Arab T, Raffo-Romero A, Van Camp C, et al. Proteomic characterisation of leech  
697 microglia extracellular vesicles (EVs): comparison between differential ultracentrifugation  
698 and Optiprep™ density gradient isolation. *J Extracell Vesicles* 2019;8:1603048.  
699

**Figure 1. Methodology and EV separation**

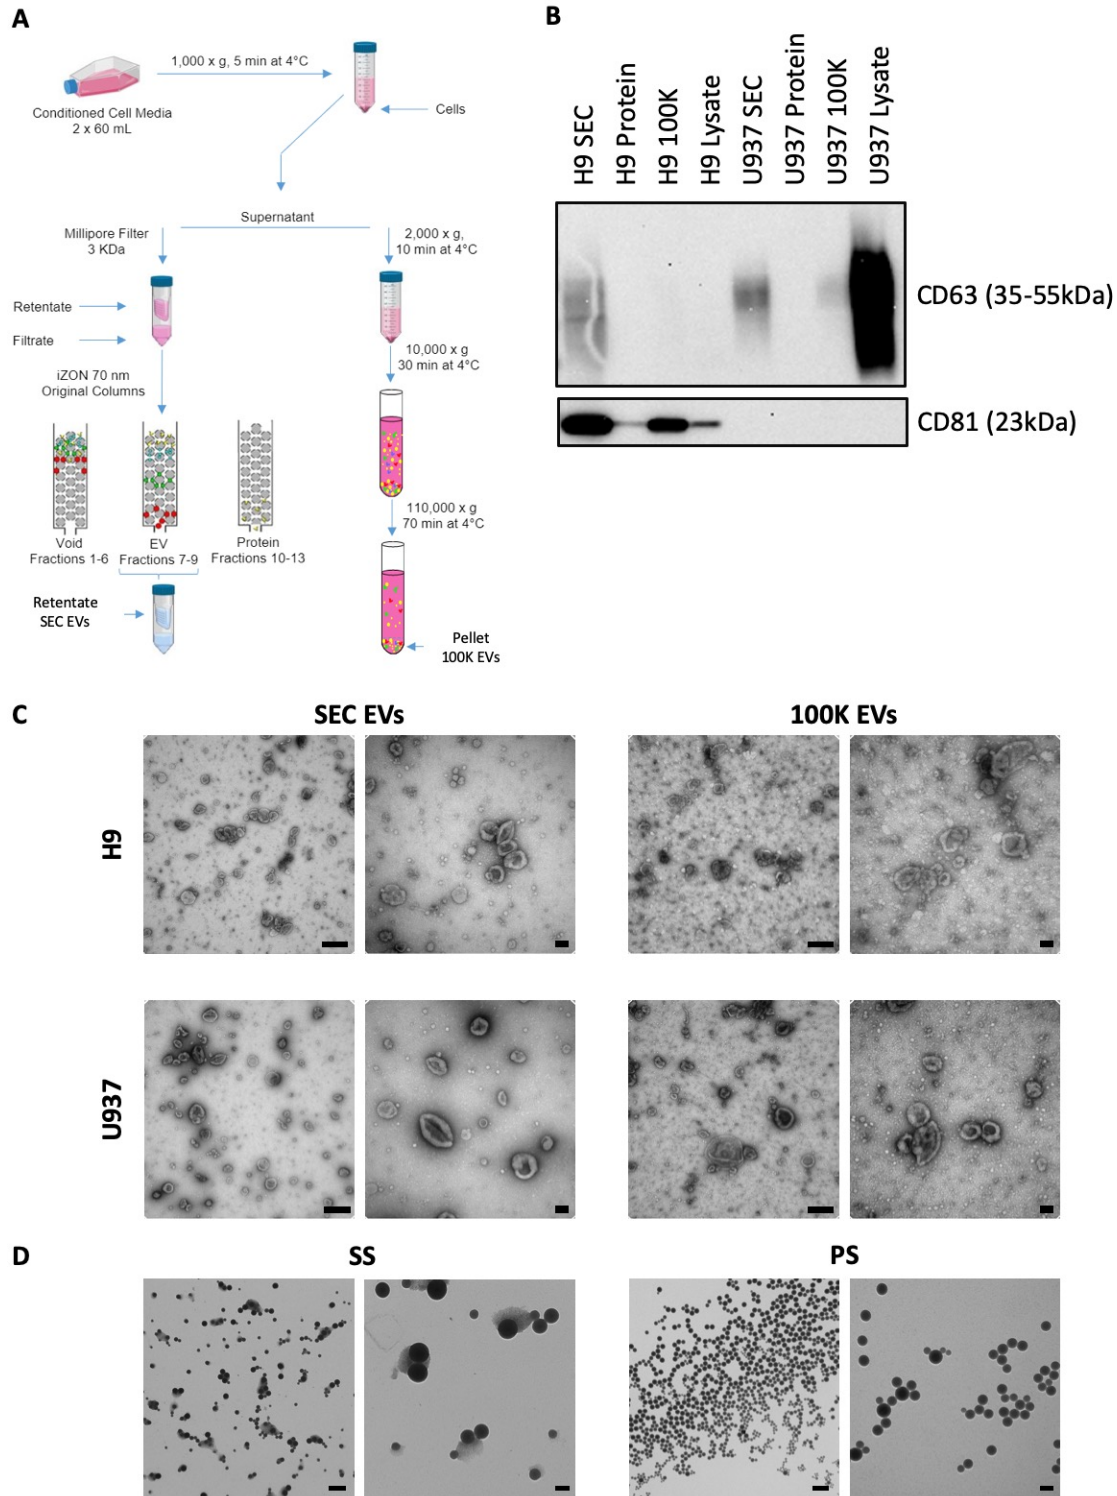

**Figure 2. SS and PS size distribution**

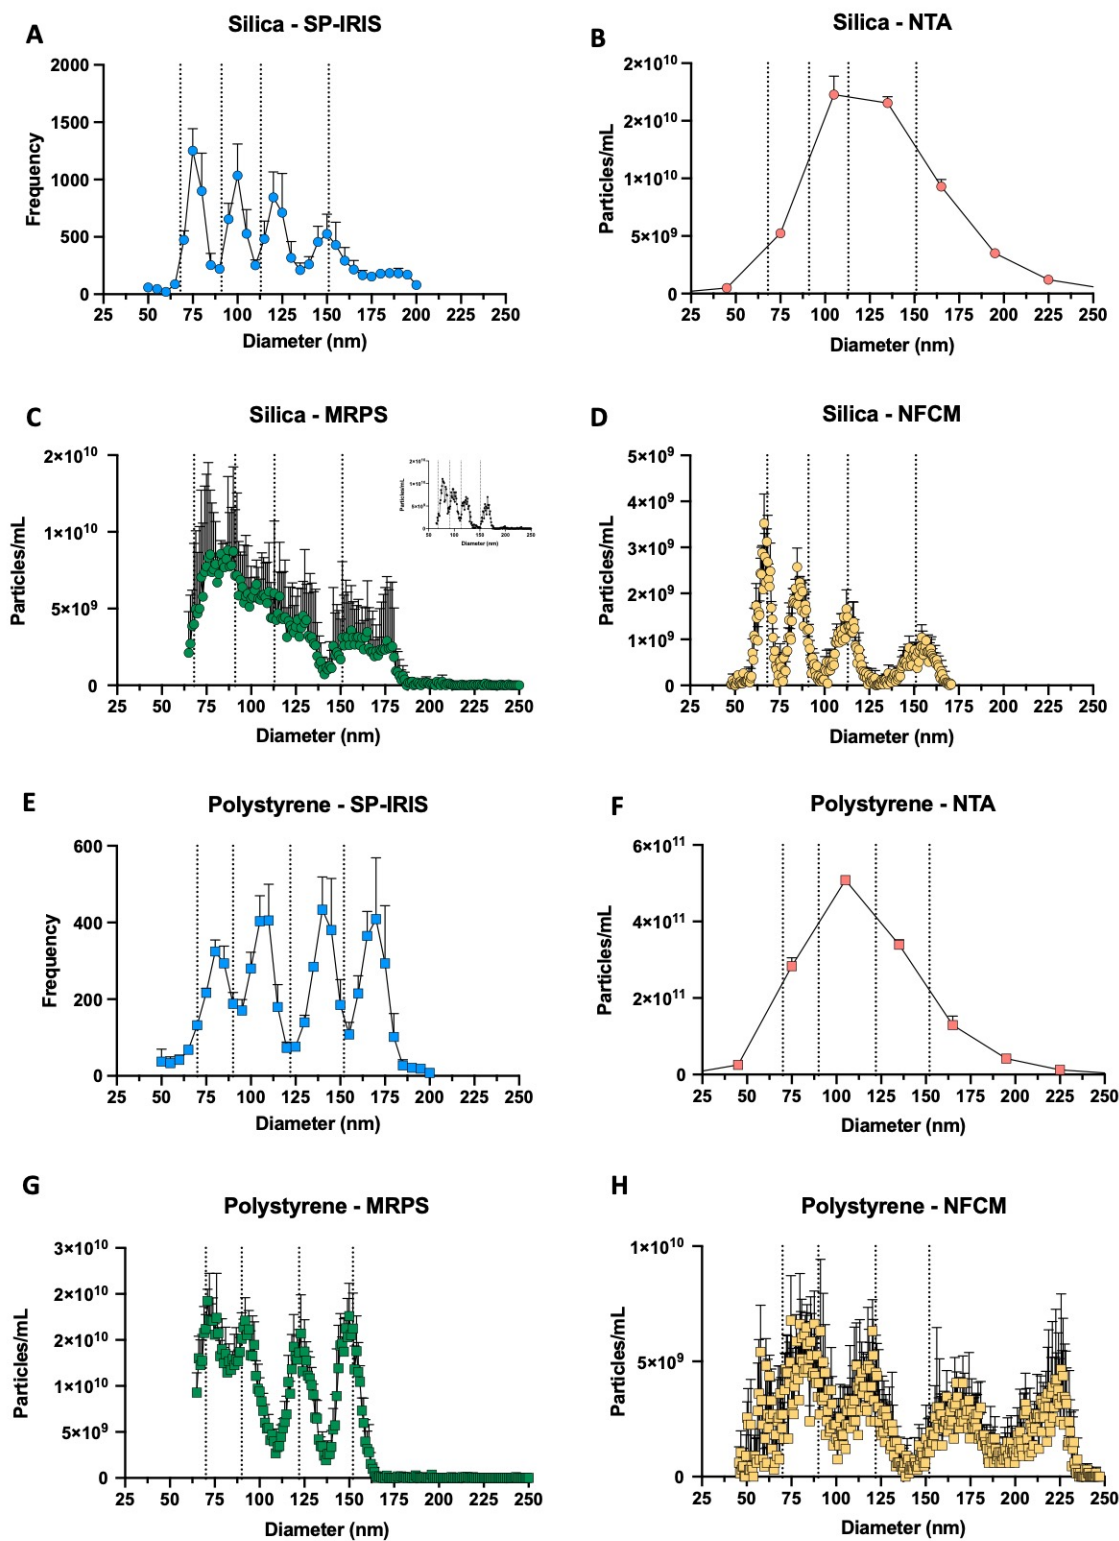

**Figure 3. SS and PS quantification**

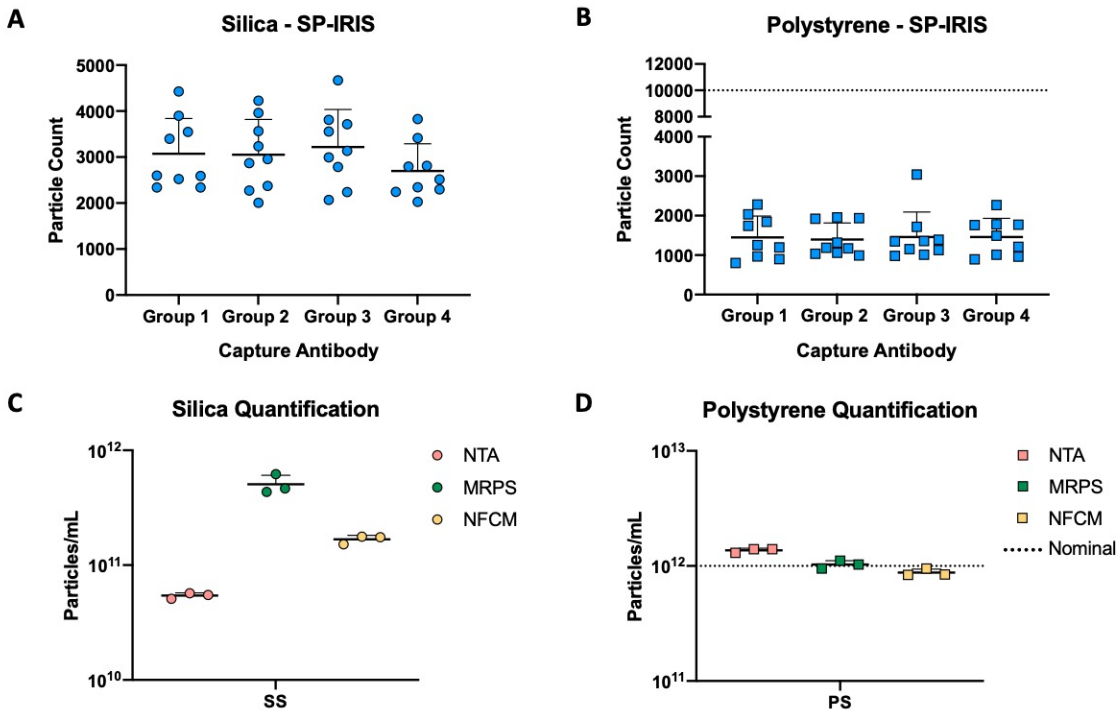

**Figure 4. H9 and U937 Size Distribution**

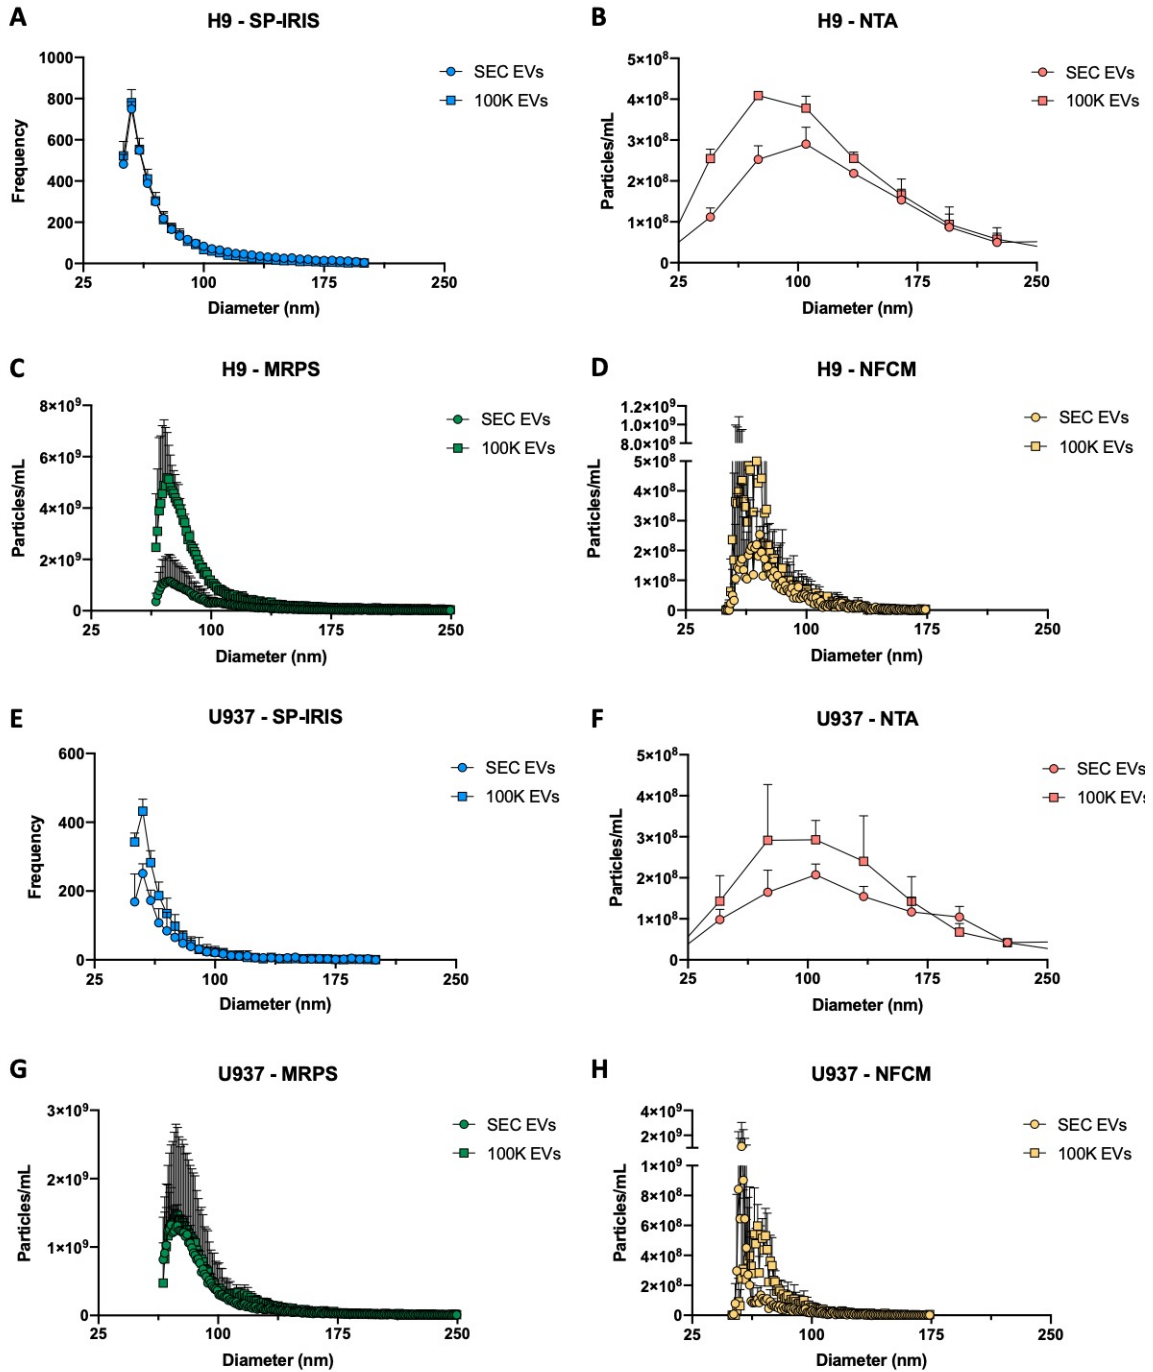

**Figure 5. H9 and U937 particle quantification**

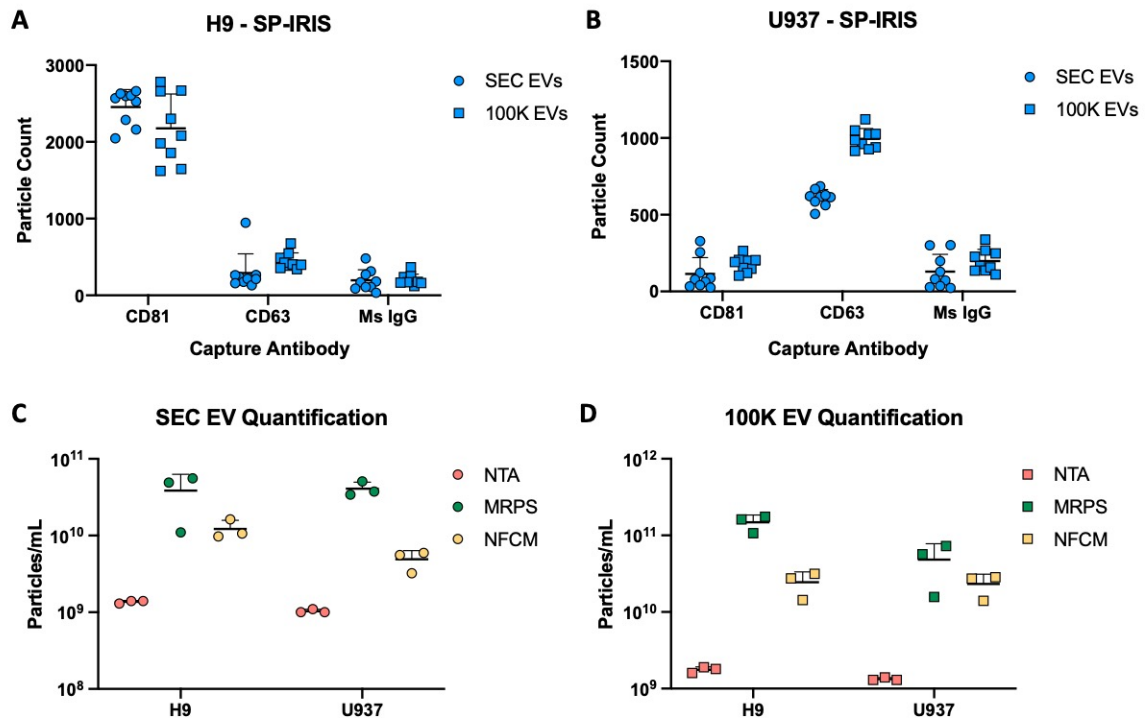

**Figure 6. Particle phenotyping**

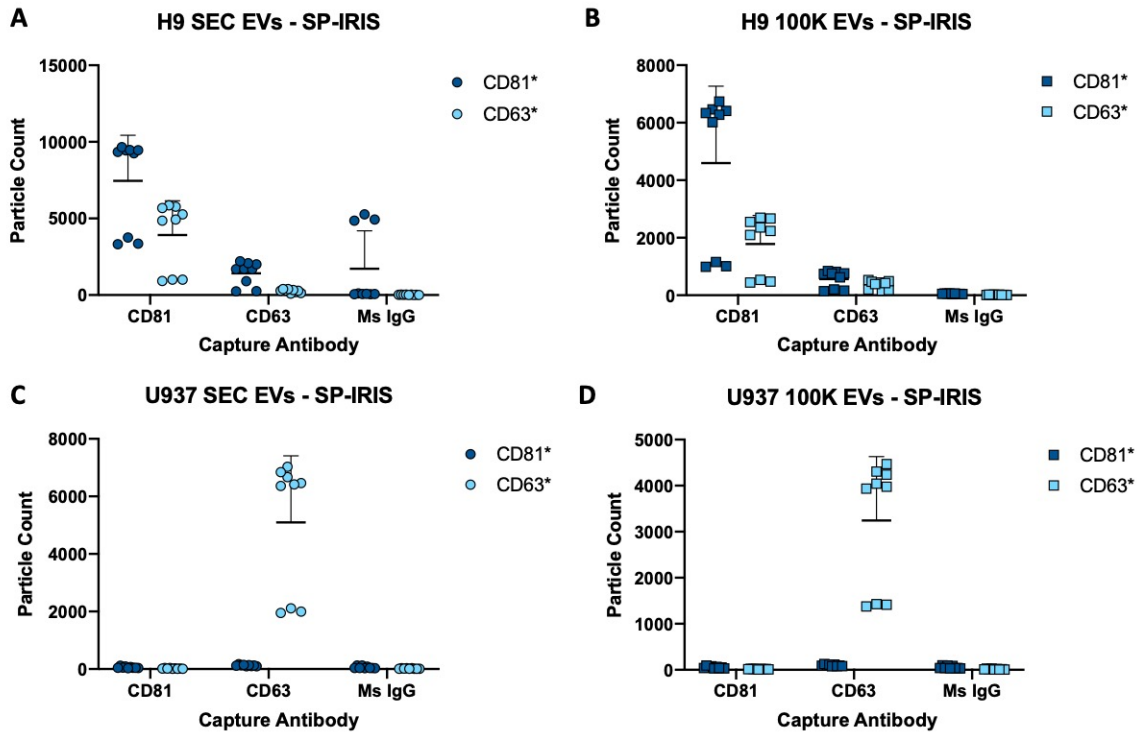

Panels A-D: \*Indicates target of fluorescent detection antibody

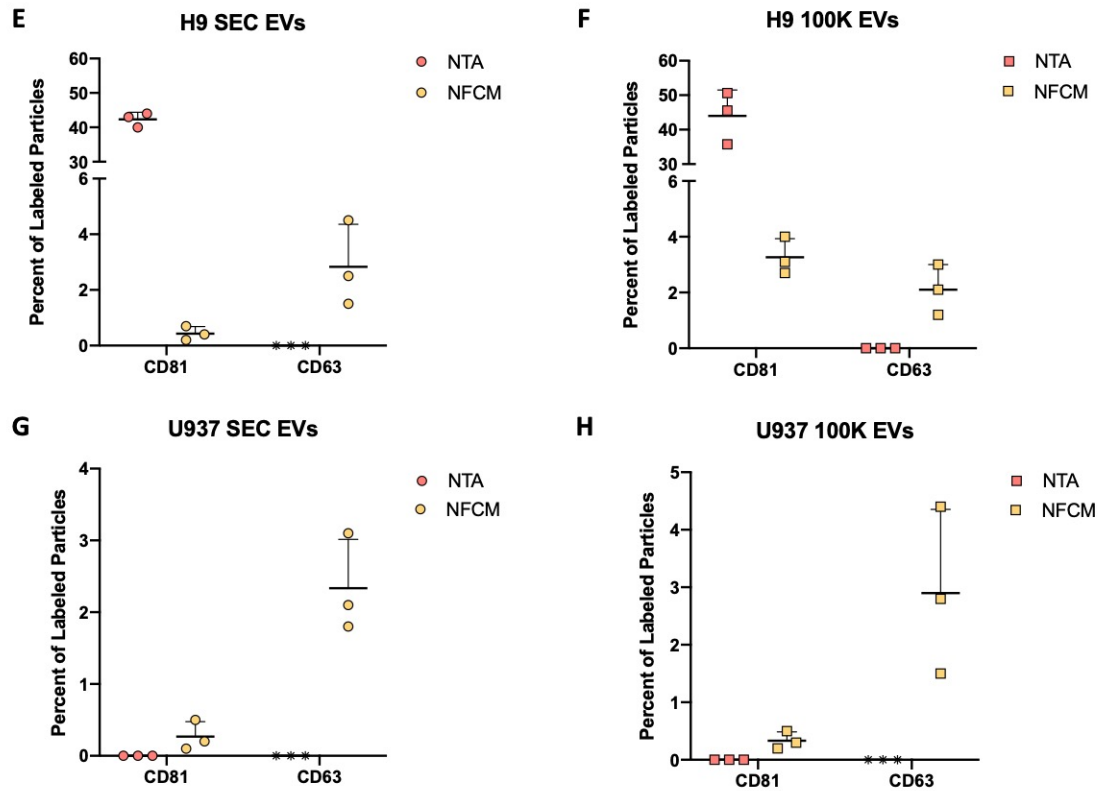



**Table 2. Evaluation summary**

| Technique | Logistics                                                     |                                                                         |                                            |                                                                                       |                 |                                                                                                         | Performance                                                     |                                                                 |                                                       |
|-----------|---------------------------------------------------------------|-------------------------------------------------------------------------|--------------------------------------------|---------------------------------------------------------------------------------------|-----------------|---------------------------------------------------------------------------------------------------------|-----------------------------------------------------------------|-----------------------------------------------------------------|-------------------------------------------------------|
|           | Estimated biological particle size detection range (diameter) | Concentration Detection Range                                           | Input volume ( $\mu$ L; may be a dilution) | Operation Time: Hands-on (HO)/ Read time (R) (does not include optional labeling)     | Instrument Cost | Costs for disposables                                                                                   | Sizing (including discrimination of different size populations) | Quantification (across all particles, biological and synthetic) | Fluorescence (channels; for instruments we evaluated) |
| SP-IRIS   | ~50 nm to 200 nm                                              | n/a; depends on capture Ab, but $>>1 \times 10^7$ particle/mL preferred | 35                                         | Day 1: 10 min sample prep (HO)<br>Day 2: 2 hour (HO); 10 min to 30 min per sample (R) | \$\$            | \$\$\$:<br>Chip/antibody kits (starting at \$50/sample to >\$100 for custom; ordered from manufacturer) | ++                                                              | -                                                               | Up to 3                                               |
| NTA       | ~70 nm to several hundred nm                                  | $1 \times 10^7$ to $1 \times 10^8$ particle/mL (in PBS)                 | 1000                                       | Optional 20 min calibration (HO/P); 5 min to 15 min per sample (HO/R)                 | \$\$            | \$:<br><\$1 per sample: 1 mL syringes (\$23 per 100, multiple suppliers; Ab not included)               | +                                                               | +                                                               | Up to 4                                               |
| MRPS      | ~50 nm to 2 $\mu$ m (cartridge-dependent)                     | $1 \times 10^7$ to $1 \times 10^{10}$ particle/mL (in PBS/PBST)         | 5                                          | Optional 20 min calibration (HO/R); 15 min to 30 min per sample (HO/R)                | \$              | \$\$:<br>Cartridges (\$8 to \$12 each, ordered from manufacturer)                                       | ++                                                              | ++                                                              | n/a                                                   |
| NFCM      | ~40 nm to 170 nm                                              | $1 \times 10^7$ to $1 \times 10^8$ particle/mL (in PBS)                 | 20                                         | 20 min to 120 min calibration (HO/P); 5 min per sample (HO/P)                         | \$\$\$          | \$:<br><\$1 per sample: 0.5 mL Tubes (\$27 per 1000, multiple suppliers; Ab not included)               | ++                                                              | ++                                                              | Up to 2                                               |

RI = refractive index; p/mL = particles per milliliter; Price range: \$\$\$ > \$\$ > \$; values in USD;  
Performance indicator: +++ > ++ > + > -

## Supplementary Figure 1. Additional EV characterization

**A**

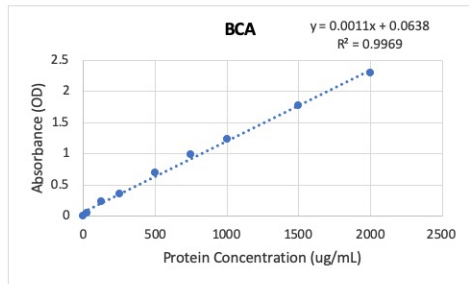

| Sample           | Protein Concentration (ug/mL) |
|------------------|-------------------------------|
| H9 SEC           | 762.42                        |
| H9 Protein       | 1547.27                       |
| H9 100K          | 2013.94                       |
| H9 Cell lysate   | 3941.21                       |
| U937 SEC         | 550.30                        |
| U937 Protein     | 1762.42                       |
| U937 100K        | 1747.27                       |
| U937 Cell lysate | 6320.00                       |

**B**

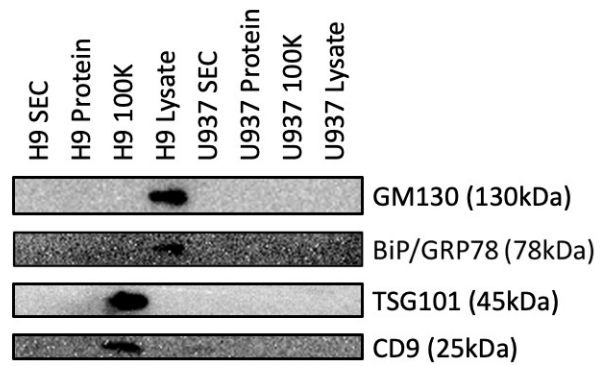

## Supplementary Figure 2. Individual SS measurements by MRPS

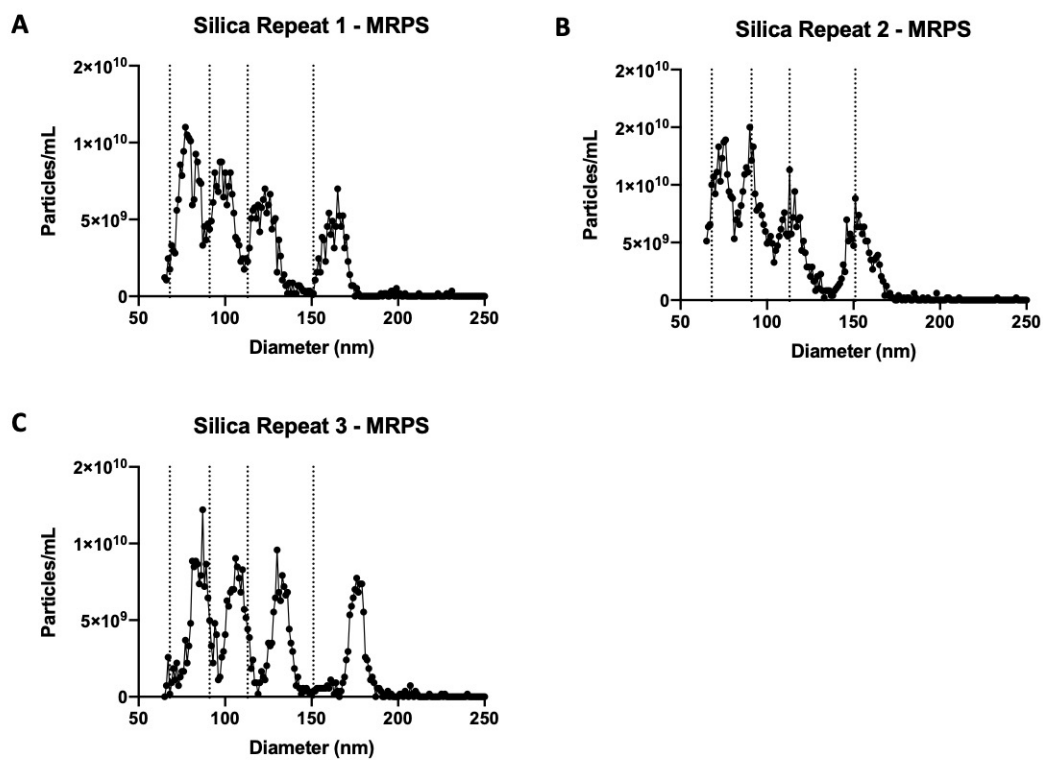

### Supplementary Figure 3. SP-IRIS background fluorescence for SS and PS

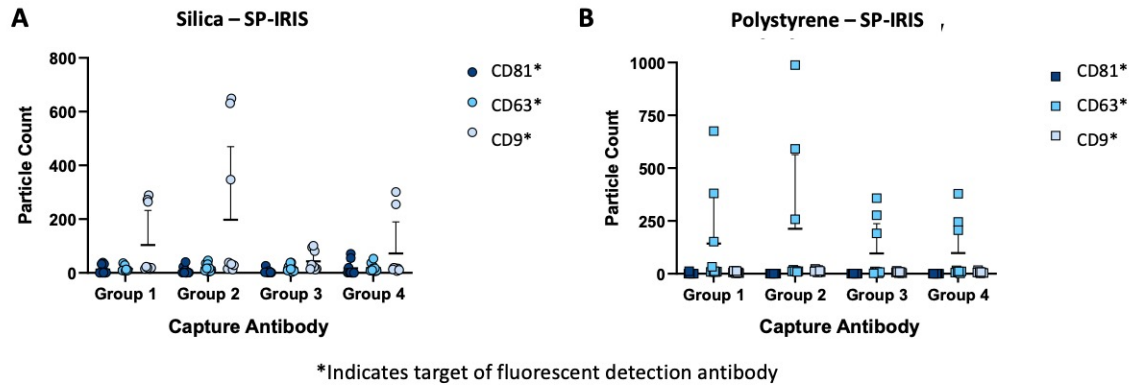

### Supplementary Figure 4. MRPS and NFCM dilution series

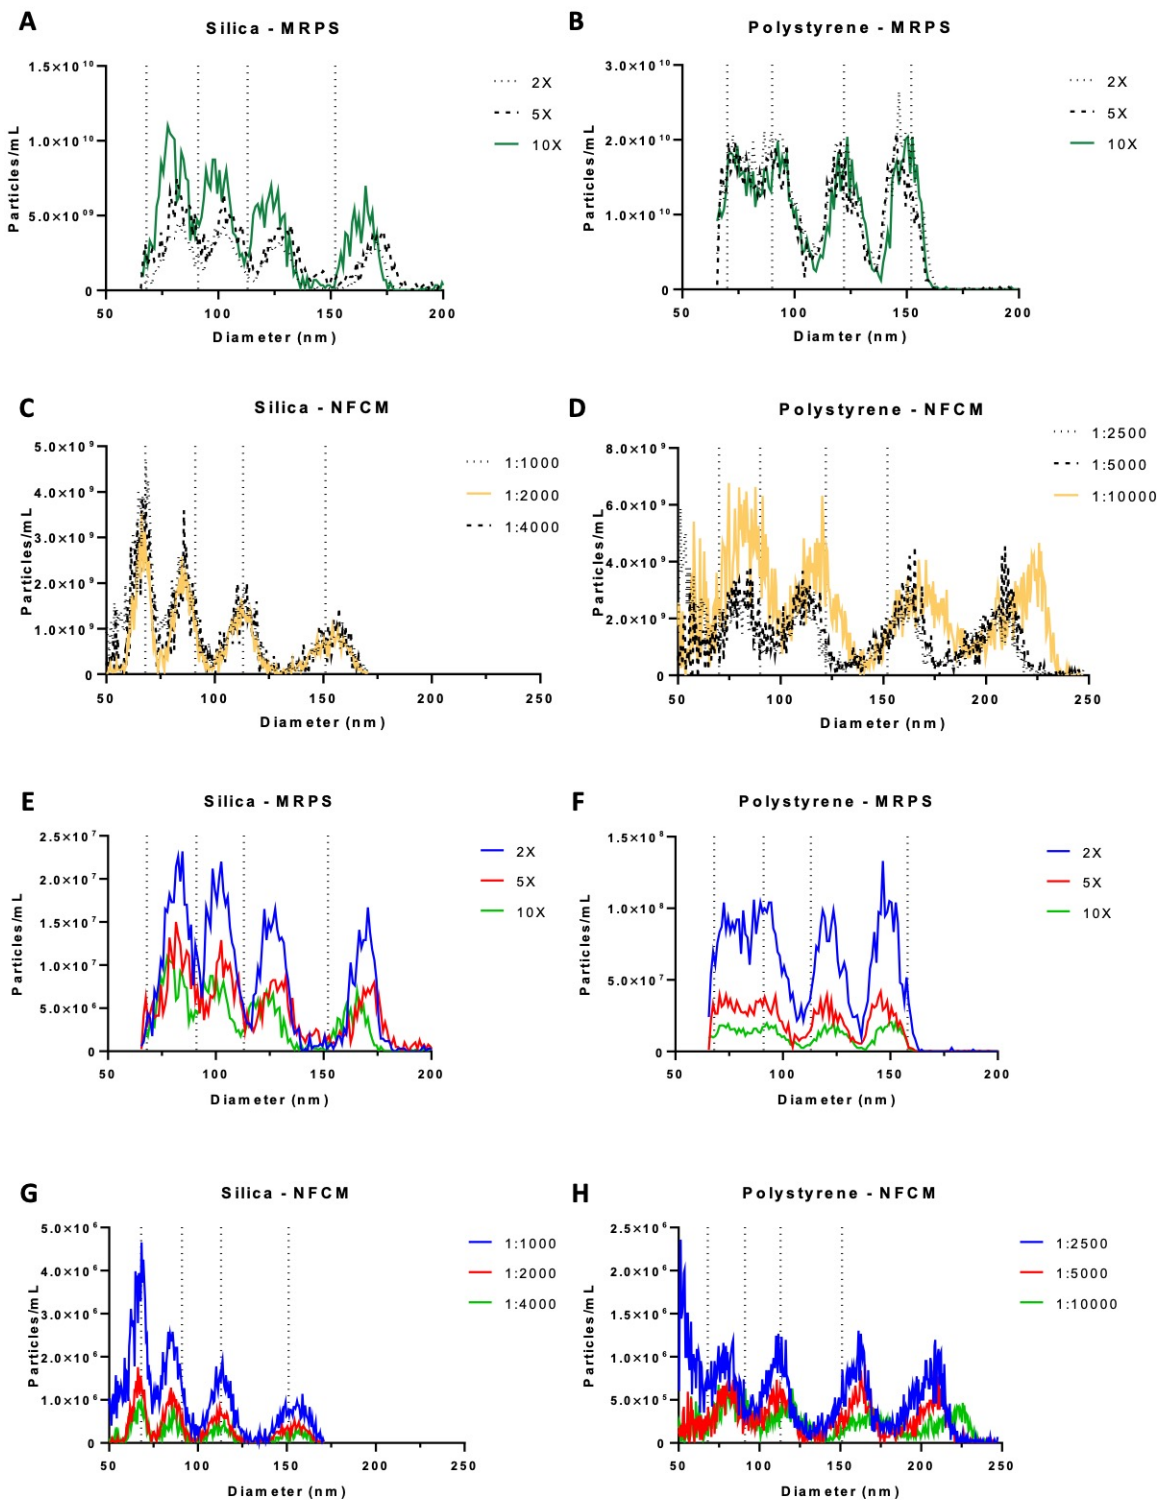

### Supplementary Table 1. Antibodies tested with fluorescent NTA

| Tetraspanin | Fluorophore | Manufacturer      | Catalog Number | Signal |
|-------------|-------------|-------------------|----------------|--------|
| CD81        | AF488       | Santa Cruz        | sc-166029      | No     |
|             | PE          | BD Biosciences    | BDB555676      | Yes    |
|             | PerCP       | BD Biosciences    | BDB565430      | No     |
|             | APC         | BD Biosciences    | BDB561958      | No     |
| CD63        | AF488       | Santa Cruz        | sc-5275        | No     |
|             | AF488       | Novus Biologicals | NBP2-42225     | No     |
|             | PE          | AbCam             | ab205540       | No     |
|             | V450        | BD Biosciences    | BDB561984      | No     |
| CD9         | PE          | BioLegend         | 312106         | No     |
|             | PerCP       | BD Biosciences    | BDB561329      | No     |
|             | FITC        | AbCam             | ab34162        | No     |
